# Supplementary material for: VISIR: technological infrastructure of an operational service for safe and efficient navigation in the Mediterranean Sea
Source: Copernicus journal article supplement (doi:10.5194/nhess-16-1791-2016), 2016-08-03
Supplement: Supplementary file 1 [file nhess-16-1791-2016-supplement.zip]

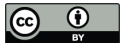

## *Supplement of*

# **VISIR: technological infrastructure of an operational service for safe and efficient navigation in the Mediterranean Sea**

**Gianandrea Mannarini et al.**

*Correspondence to:* G. Mannarini (gianandrea.mannarini@cmcc.it)

- nhess-16-1791-2016-supplement-title-page.pdf
- \_\_MACOSX
  - motorboat route - Fig.7 (correlation-ID=7125)
    - \* .\_.DS\_Store
    - \* input
    - \* output
  - sailboat route - Fig.8 (correlation-ID=7131)
    - \* .\_.DS\_Store
- motorboat route - Fig.7 (correlation-ID=7125)
  - .DS\_Store
  - input
    - \* algo.out
    - \* datetime\_pars.txt
    - \* extrema\_pars.txt
    - \* optim\_pars.txt
    - \* safety\_pars.txt
    - \* ship\_pars.txt
    - \* submissionString.txt
    - \* visualization\_pars.txt
  - output
    - \* 2\_gdt\_voyageplan.json
    - \* 2\_gdt\_voyageplan.tab
    - \* 2\_log.txt
    - \* 2\_namelist\_log.txt
    - \* 2\_voyageplan.json

- \* 2\_voyageplan.tab
- sailboat route - Fig.8 (correlation-ID=7131)
  - .DS\_Store
  - input
    - \* .submissionString.txt.swp
    - \* algo.out
    - \* datetime\_pars.txt
    - \* extrema\_pars.txt
    - \* optim\_pars.txt
    - \* safety\_pars.txt
    - \* ship\_pars.txt
    - \* submissionString.txt
    - \* visualization\_pars.txt
  - output
    - \* 2\_gdt\_voyageplan.json
    - \* 2\_gdt\_voyageplan.tab
    - \* 2\_log.txt
    - \* 2\_namelist\_log.txt
    - \* 2\_voyageplan.json
    - \* 2\_voyageplan.tab

The copyright of individual parts of the supplement might differ from the CC-BY 3.0 licence.
